# Supplementary material
Source: publisher figshare collection journal article supplement (https://acs.figshare.com/ndownloader/files/17597093)
Supplement: Supplementary file 1 [file 17597093]

## Supporting Information

### **Single Crystal ZrO<sub>2</sub> Nanosheets Formed by Thermal Transformation for Solid Oxide Fuel Cells and Oxygen Sensors**

Tetsuya Yamada<sup>1\*</sup>, Yuta Kubota<sup>2</sup>, Yuki Makinose<sup>3</sup>, Norihiro Suzuki<sup>4</sup>, Kazuya Nakata<sup>4</sup>,  
Chiaki Terashima<sup>4</sup>, Nobuhiro Matsushita<sup>2</sup>, Kiyoshi Okada<sup>5</sup>, Akira Fujishima<sup>4</sup> and

Ken-ichi Katsumata<sup>4\*</sup>

<sup>1</sup> Department of Electronic Chemistry, Interdisciplinary Graduate School of Science and Engineering, Tokyo Institute of Technology, 4259 Nagatsuta, Midori, Yokohama, Kanagawa 226-8503, Japan

<sup>2</sup> Department of Materials Science and Engineering, School of Materials and Chemical Technology, Tokyo Institute of Technology, 2-12-1 Ookayama, Meguro-ku, Tokyo 152-8550, Japan

<sup>3</sup> Department of Chemistry, Graduate School of Natural Science and Technology, Shimane University, 1060 Nishikawatsu, Matsue, Shimane 690-8504, Japan

<sup>4</sup> Photocatalysis International Research Center, Research Institute for Science and Technology, Tokyo University of Science, 2641 Yamazaki, Noda, Chiba 278-8510, Japan

<sup>5</sup> Tokyo Institute of Technology, 2-12-1 Ookayama, Meguro-ku, Tokyo 152-8550, Japan

**\*Corresponding author:** Ken-ichi Katsumata, Ph.D. and Tetsuya Yamada, Ph.D.

**E-mail:** k.katsumata@rs.tus.ac.jp; yamada94@iis.u-tokyo.ac.jp

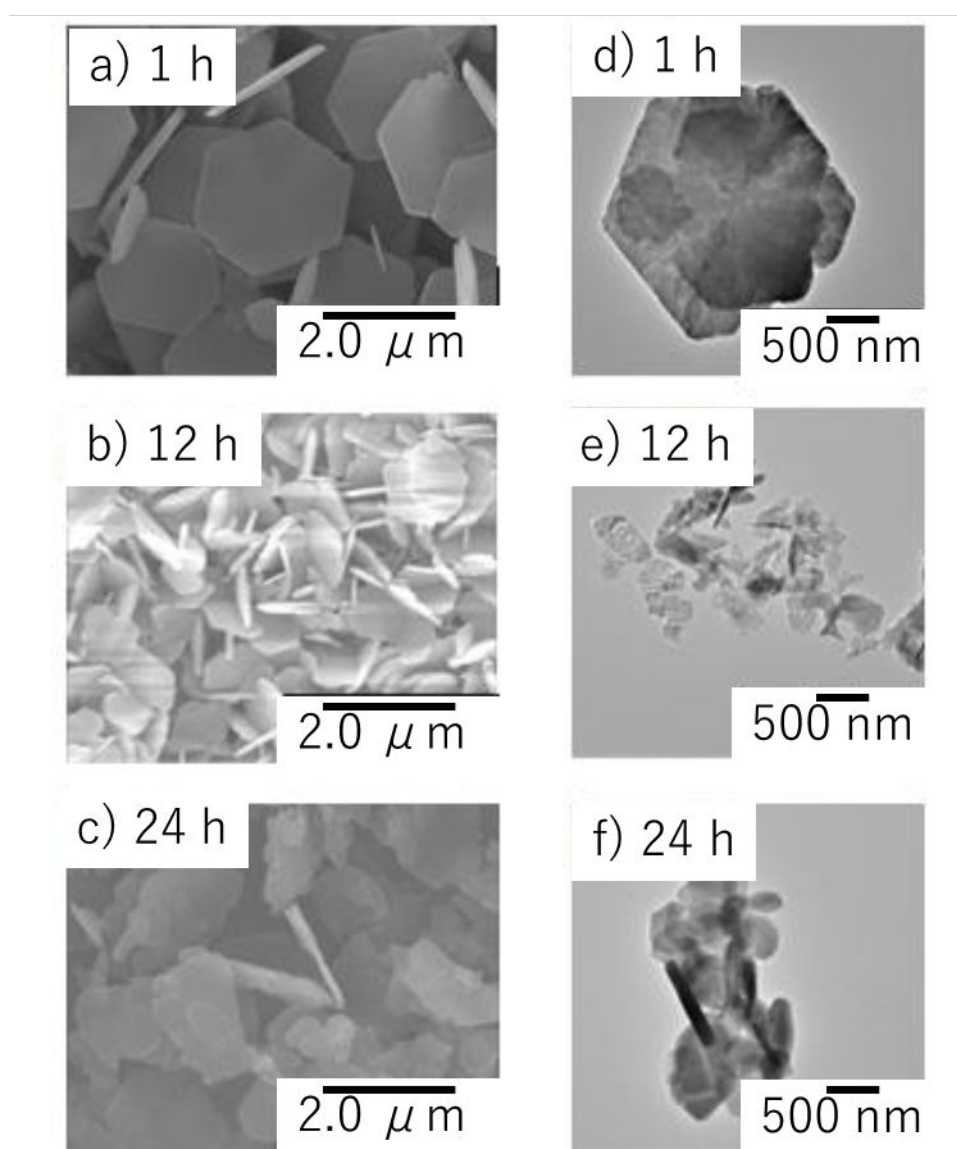

**Figure S1.** SEM images of the samples prepared by ionothermal at different heating time; (a) 1 h (b) 12 h, (c) 24 h. TEM image of of the samples prepared by ionothermal at different heating time; (d) 1 h (e) 12 h, (f) 24 h

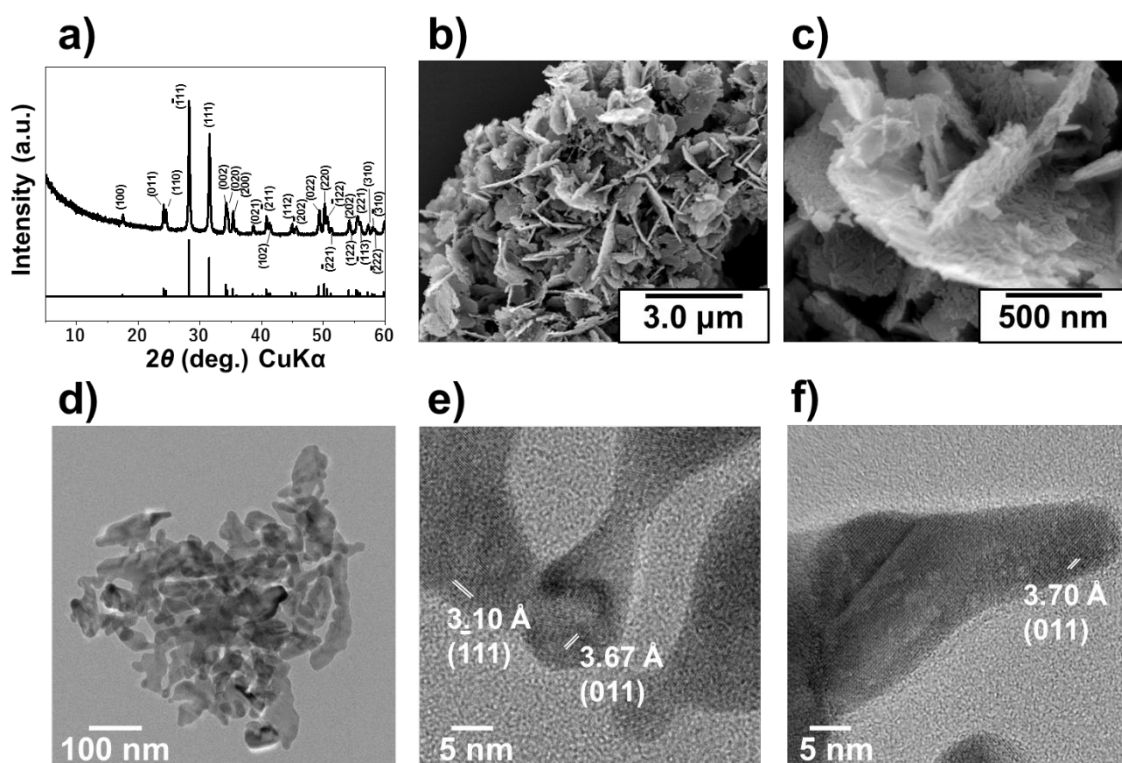

**Figure S2.** a) XRD pattern of  $\text{ZrO}_2$  sample after thermal transformation without ionic liquid, including reference pattern ICDD #01-081-1314; b,c) SEM images of the  $\text{ZrO}_2$  after thermal transformation; d-f) TEM images of the  $\text{ZrO}_2$  after thermal transformation.

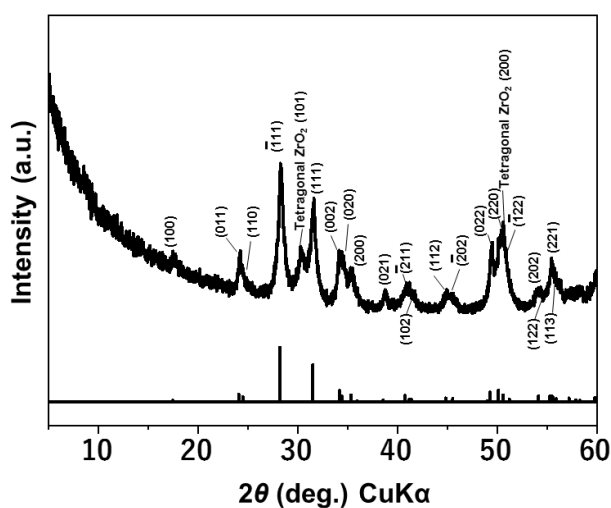

**Figure S3.** XRD pattern of  $\text{ZrO}_2$  sample after thermal transformation in an ionic liquid, including reference pattern ICDD #01-081-1314.

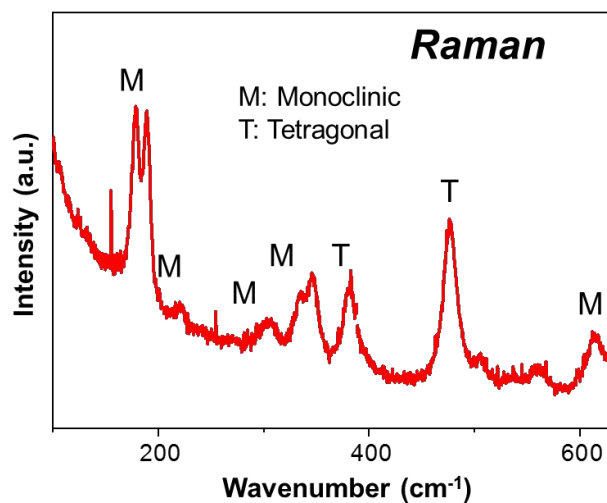

**Figure S4.** Raman spectrum of powder of  $\text{ZrO}_2$  nanosheet. M indicates the peaks attribute to monoclinic phase. T indicates the peak attribute to tetragonal phase.

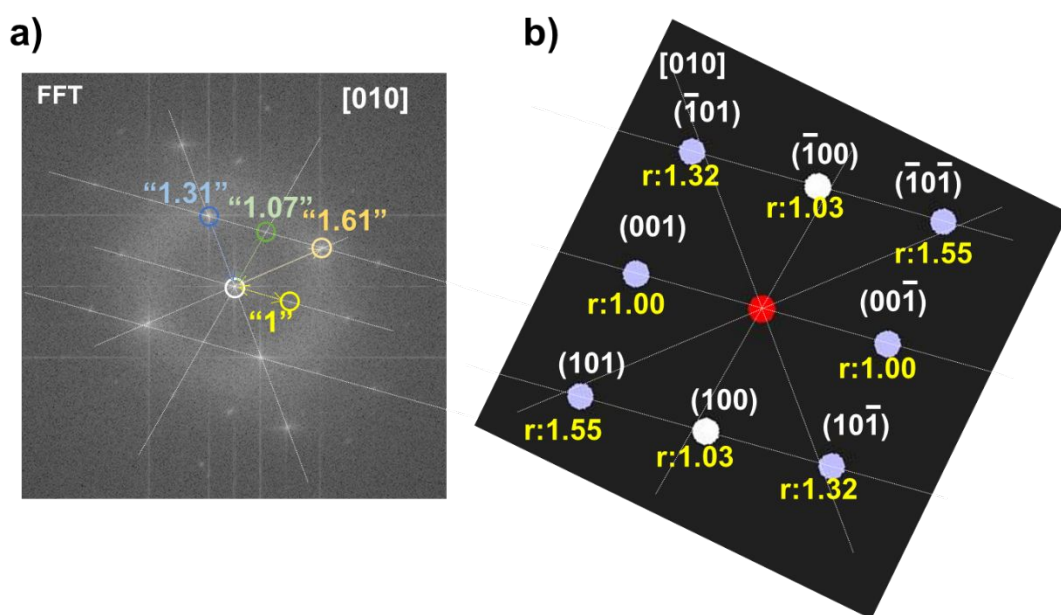

**Figure S5** a) FFT analysis of the Figure 2c; b) The simulated FFT pattern from the direction of  $[010]$ . The  $r$  indicates a relative length from origin defining the distance from the origin to closest spot to be 1.

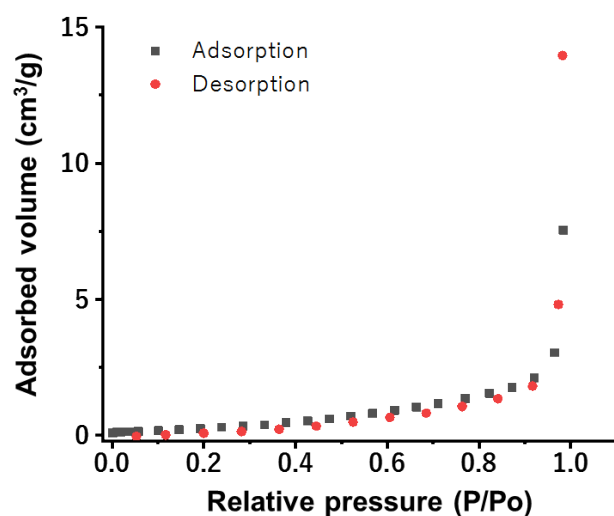

**Figure S6** Nitrogen physisorption isotherms of  $\text{ZrO}_2$  nanosheets. Adsorbed amounts of gas are measured as a function of relative pressure. The black plots and red plots show the adsorption and desorption, respectively.

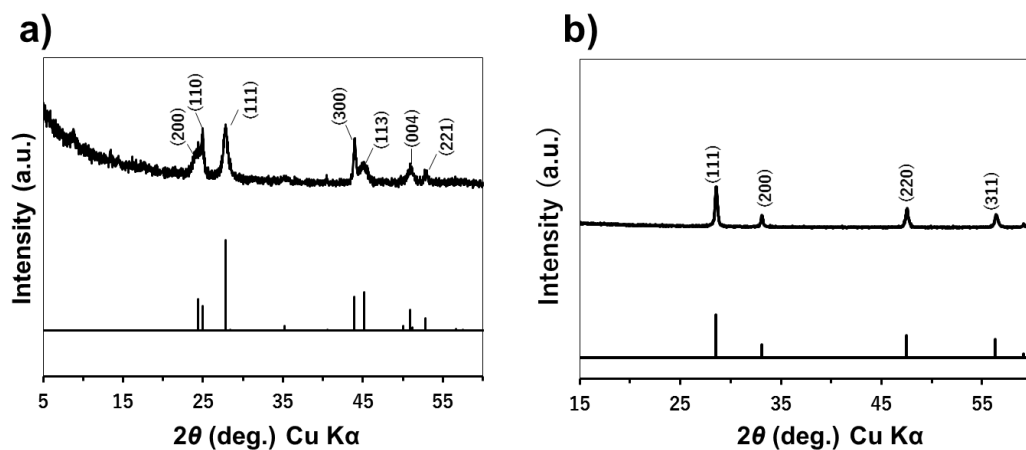

**Figure S7** a) XRD pattern of  $\text{CeF}_3$  obtained after ionothermal treatment; b) XRD pattern of  $\text{CeO}_2$  obtained after thermal transformation in ionic liquid. Bottom pattern are references, ICDD # 01-089-1933 ( $\text{CeF}_3$ ) and ICDD # 00-034-0394 ( $\text{CeO}_2$ )

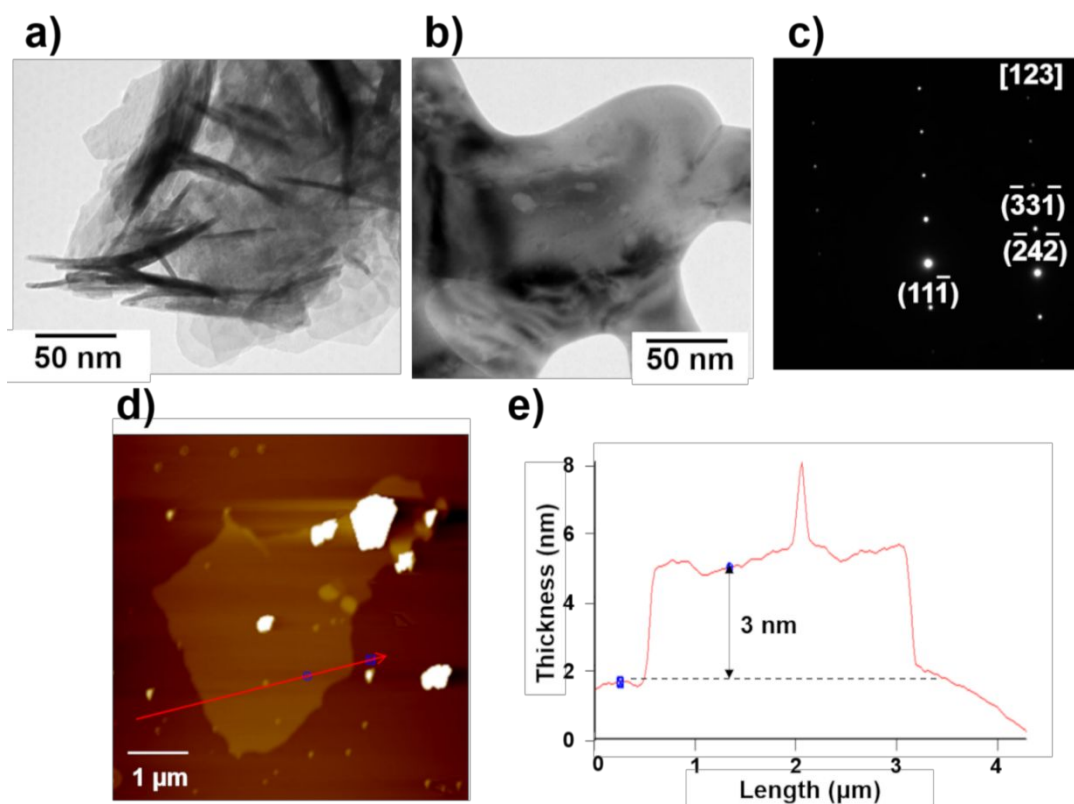

**Figure S8.** a) TEM image of CeF<sub>3</sub> synthesized by ionothermal treatment; b) TEM image of a CeO<sub>2</sub> nanosheet; c) SAED pattern of one CeO<sub>2</sub> nanosheet; d) AFM image of a CeO<sub>2</sub> nanosheet; e) Thickness profile for the direction indicated by the arrow in d).
